# Supplementary material
Source: HighWire-hosted journal article supplement (https://bmjopen.bmj.com/content/8/7/e021805)
Supplement: inline-supplementary-material-1 [file inline-supplementary-material-1.pdf]

### **Electronic Supplementary Tables and Figures**

**Title:** Cohort Profile: The Predictors of Breast Cancer Recurrence (ProBe CaRE) Premenopausal Breast Cancer Cohort Study in Denmark

**Author List:** Lindsay J Collin, Deirdre P Cronin-Fenton, Thomas P Ahern, Peer M Christiansen, Per Damkier, Bent Ejlersen, Stephen Hamilton-Dutoit, Anders Kjærsgaard, Rebecca A Silliman, Henrik Toft Sørensen, Timothy L Lash

To whom correspondence should be addressed: Lindsay J Collin, Department of Epidemiology, Rollins School of Public Health, Emory University, 1518 Clifton Rd NE Atlanta GA 30322; Phone: 1-530-386-3341; Email: [lindsay.jane.collin@emory.edu](mailto:lindsay.jane.collin@emory.edu), ORCID: 0000-0003-0170-2592

**Electronic Supplementary Table 1** Comparison of clinical and tumour characteristics by availability of tumour specimen for each ER $\alpha$ +/T+ and ER $\alpha$ -/T- group, among the 5,959 participants in a population-based cohort of premenopausal women diagnosed with first primary breast cancer, ProBe CaRe study.

| Patient and tumour characteristics | ER+/TAM+                  |     |     |      | ER-/TAM- |      |     |      |
|------------------------------------|---------------------------|-----|-----|------|----------|------|-----|------|
|                                    | Tumour Specimen Available |     |     |      |          |      |     |      |
|                                    | Yes                       |     | No  |      | Yes      |      | No  |      |
|                                    | N                         | %   | N   | %    | N        | %    | N   | %    |
| Total                              | 3959                      | 86  | 640 | 14.0 | 1139     | 84.0 | 220 | 16.0 |
| Age at diagnosis                   |                           |     |     |      |          |      |     |      |
| <35                                | 197                       | 5   | 25  | 3.9  | 156      | 14   | 26  | 12   |
| 35-49                              | 408                       | 10  | 79  | 12   | 178      | 16   | 51  | 23   |
| 40-44                              | 973                       | 25  | 149 | 23   | 270      | 24   | 51  | 23   |
| 45-49                              | 1455                      | 37  | 213 | 33   | 324      | 28   | 61  | 28   |
| 50+                                | 926                       | 23  | 174 | 27   | 211      | 19   | 31  | 14   |
| Stage at diagnosis                 |                           |     |     |      |          |      |     |      |
| Stage I                            | 1020                      | 26  | 164 | 26   | 334      | 29   | 68  | 31   |
| Stage II                           | 2125                      | 54  | 350 | 55   | 590      | 52   | 112 | 51   |
| Stage III                          | 796                       | 20  | 121 | 19   | 207      | 18   | 39  | 18   |
| Unknown stage                      | 18                        | 0.5 | 5   | 0.8  | 8        | 0.7  | 1   | 0.5  |
| Tumor size                         |                           |     |     |      |          |      |     |      |
| < 2mm                              | 2267                      | 57  | 379 | 59   | 553      | 49   | 124 | 56   |
| 2 - <5mm                           | 1544                      | 39  | 235 | 37   | 540      | 47   | 92  | 42   |
| > 5mm                              | 133                       | 3.4 | 23  | 3.6  | 41       | 3.6  | 3   | 1.4  |
| Unknown                            | 15                        | 0.4 | 3   | 0.5  | 5        | 0.4  | 1   | 0.5  |
| Number of metastatic lymph nodes   |                           |     |     |      |          |      |     |      |
| 0                                  | 1469                      | 37  | 235 | 37   | 582      | 51   | 113 | 51   |
| 1                                  | 982                       | 25  | 166 | 26   | 194      | 17   | 44  | 20   |
| 2                                  | 493                       | 13  | 90  | 14   | 101      | 8.3  | 15  | 6.8  |
| 3+                                 | 1004                      | 25  | 147 | 23   | 259      | 23   | 47  | 21   |
| Unknown                            | 11                        | 0.3 | 2   | 0.3  | 3        | 0.3  | 1   | 0.5  |
| Lymph node evaluation              |                           |     |     |      |          |      |     |      |
| No                                 | 7                         | 0.2 | 1   | 0.2  | 2        | 0.2  | 1   | 0.5  |
| Yes                                | 3952                      | 100 | 639 | 100  | 1137     | 99.8 | 219 | 99.5 |
| Histologic grade                   |                           |     |     |      |          |      |     |      |
| Unsuitable                         | 7                         | 0.2 | 3   | 0.5  | 11       | 1    | 2   | 0.9  |
| I                                  | 839                       | 21  | 116 | 18   | 21       | 1.8  | 0   | 0    |
| II                                 | 2024                      | 51  | 366 | 57   | 182      | 16   | 34  | 15   |
| III                                | 822                       | 21  | 128 | 20   | 737      | 65   | 147 | 67   |
| Unknown                            | 267                       | 6.7 | 27  | 4.2  | 188      | 17   | 37  | 17   |
| Type of primary surgery            |                           |     |     |      |          |      |     |      |
| Mastectomy                         | 1759                      | 44  | 273 | 43   | 538      | 47   | 89  | 40   |

|                                      |      |     |     |     |      |      |     |      |
|--------------------------------------|------|-----|-----|-----|------|------|-----|------|
| Lumpectomy                           | 2200 | 56  | 367 | 57  | 601  | 53   | 131 | 60   |
| Progesterone receptor status         |      |     |     |     |      |      |     |      |
| PR-                                  | 308  | 7.8 | 75  | 12  | 919  | 80.7 | 202 | 91.8 |
| PR+                                  | 2245 | 57  | 435 | 68  | 17   | 1.5  | 2   | 0.9  |
| Unknown/Not measured                 | 1406 | 35  | 130 | 20  | 203  | 17.8 | 16  | 7.3  |
| HER2 status                          |      |     |     |     |      |      |     |      |
| HER2-                                | 2489 | 63  | 397 | 62  | 579  | 51   | 113 | 51   |
| HER2+                                | 532  | 13  | 87  | 14  | 300  | 26   | 54  | 25   |
| Unknown/Not measured                 | 938  | 24  | 156 | 24  | 260  | 23   | 53  | 24   |
| Intention to treat with chemotherapy |      |     |     |     |      |      |     |      |
| No                                   | 126  | 3.2 | 18  | 3   | 11   | 1    | 3   | 1.4  |
| Yes                                  | 3833 | 97  | 622 | 97  | 1128 | 99   | 217 | 99   |
| Chemotherapy                         |      |     |     |     |      |      |     |      |
| No                                   | 386  | 9.7 | 51  | 8   | 85   | 7.5  | 24  | 11   |
| Yes                                  | 3573 | 90  | 589 | 92  | 1054 | 93   | 196 | 89   |
| Intention to treat with Tamoxifen    |      |     |     |     |      |      |     |      |
| No                                   | 62   | 1.6 | 8   | 1.3 | 1131 | 99   | 220 | 100  |
| Yes                                  | 3897 | 98  | 632 | 99  | 8    | 0.7  | 0   | 0    |
| Radiation therapy                    |      |     |     |     |      |      |     |      |
| No                                   | 565  | 14  | 90  | 14  | 230  | 20   | 37  | 17   |
| Yes                                  | 3394 | 86  | 550 | 86  | 909  | 80   | 183 | 83   |
| Anti-HER2 therapy                    |      |     |     |     |      |      |     |      |
| No                                   | 2489 | 63  | 397 | 62  | 579  | 51   | 113 | 51   |
| Yes                                  | 532  | 13  | 87  | 14  | 300  | 26   | 54  | 25   |
| Unknown                              | 938  | 24  | 156 | 24  | 260  | 23   | 53  | 24   |
| Recurrence                           |      |     |     |     |      |      |     |      |
| No                                   | 3625 | 92  | 579 | 90  | 962  | 84   | 181 | 82   |
| Yes                                  | 334  | 8.4 | 61  | 9.5 | 177  | 16   | 39  | 18   |
| Another malignancy                   |      |     |     |     |      |      |     |      |
| No                                   | 3911 | 99  | 632 | 99  | 1126 | 99   | 215 | 98   |
| Yes                                  | 48   | 1.2 | 8   | 1.3 | 13   | 1.1  | 5   | 2.3  |
| Dead at end-of-follow-up             |      |     |     |     |      |      |     |      |
| No                                   | 3648 | 92  | 591 | 92  | 932  | 82   | 183 | 83   |
| Yes                                  | 311  | 7.9 | 49  | 7.7 | 207  | 18   | 37  | 17   |
| Charlson Comorbidity Score           |      |     |     |     |      |      |     |      |
| 0                                    | 3949 | 100 | 637 | 100 | 1124 | 99   | 220 | 100  |
| 1                                    | 3    | 0.1 | 1   | 0.2 | 4    | 0.4  | 0   | 0    |
| 2                                    | 0    | 0   | 2   | 0.3 | 3    | 0.3  | 0   | 0    |
| 3+                                   | 7    | 0.2 | 0   | 0   | 8    | 0.7  | 0   | 0    |

**Electronic Supplementary Table 2** Comparison of clinical and tumour characteristics by availability of non-neoplastic tissue specimen for each ERα+/T+ and ERα-/T- group, among the 5,959 participants in a population-based cohort of premenopausal women diagnosed with first primary breast cancer, ProBe CaRe study

| Patient and tumour characteristics | ER+/TAM+                               |      |     |      | ER-/TAM- |      |     |      |
|------------------------------------|----------------------------------------|------|-----|------|----------|------|-----|------|
|                                    | Non-neoplastic Tissue Sample Available |      |     |      |          |      |     |      |
|                                    | Yes                                    |      | No  |      | Yes      |      | No  |      |
|                                    | N                                      | %    | N   | %    | N        | %    | N   | %    |
| Total                              | 3746                                   | 92.0 | 853 | 19.0 | 1082     | 80.0 | 277 | 20.0 |
| Age at diagnosis                   |                                        |      |     |      |          |      |     |      |
| <35                                | 188                                    | 5    | 34  | 4    | 157      | 15   | 25  | 9    |
| 35-49                              | 392                                    | 11   | 95  | 11   | 161      | 15   | 68  | 25   |
| 40-44                              | 916                                    | 24   | 206 | 24   | 267      | 25   | 54  | 20   |
| 45-49                              | 1364                                   | 36   | 304 | 36   | 309      | 29   | 76  | 27   |
| 50+                                | 886                                    | 24   | 214 | 25   | 188      | 17   | 54  | 20   |
| Stage at diagnosis                 |                                        |      |     |      |          |      |     |      |
| Stage I                            | 966                                    | 26   | 218 | 26   | 317      | 29   | 85  | 31   |
| Stage II                           | 2005                                   | 54   | 470 | 55   | 560      | 52   | 142 | 51   |
| Stage III                          | 759                                    | 20   | 158 | 19   | 199      | 18   | 47  | 17   |
| Unknown stage                      | 16                                     | 0.4  | 7   | 0.8  | 6        | 0.6  | 3   | 1.1  |
| Tumor size                         |                                        |      |     |      |          |      |     |      |
| < 2mm                              | 2150                                   | 57   | 496 | 58   | 522      | 48   | 155 | 56   |
| 2 - <5mm                           | 1450                                   | 39   | 329 | 39   | 515      | 48   | 117 | 42   |
| > 5mm                              | 131                                    | 3.5  | 25  | 2.9  | 41       | 3.8  | 3   | 1.1  |
| Unknown                            | 15                                     | 0.4  | 3   | 0.4  | 4        | 0.4  | 2   | 0.7  |
| Number of metastatic lymph nodes   |                                        |      |     |      |          |      |     |      |
| 0                                  | 1385                                   | 37   | 319 | 37   | 556      | 51   | 139 | 50   |
| 1                                  | 929                                    | 25   | 219 | 26   | 177      | 16   | 61  | 22   |
| 2                                  | 482                                    | 13   | 101 | 12   | 97       | 9    | 19  | 6.9  |
| 3+                                 | 941                                    | 25   | 210 | 25   | 250      | 23   | 56  | 20   |
| Unknown                            | 9                                      | 0.2  | 4   | 0.5  | 2        | 0.2  | 2   | 0.7  |
| Lymph node evaluation              |                                        |      |     |      |          |      |     |      |
| No                                 | 6                                      | 0.2  | 2   | 0.2  | 1        | 0.1  | 2   | 0.7  |
| Yes                                | 3740                                   | 100  | 851 | 100  | 1081     | 100  | 275 | 99   |
| Histologic grade                   |                                        |      |     |      |          |      |     |      |
| Unsuitable                         | 5                                      | 0.1  | 5   | 0.6  | 10       | 0.9  | 3   | 1.1  |
| I                                  | 791                                    | 21   | 164 | 19   | 17       | 1.6  | 4   | 1.4  |
| II                                 | 1882                                   | 50   | 508 | 60   | 166      | 15   | 50  | 18   |
| III                                | 806                                    | 22   | 144 | 17   | 708      | 65   | 176 | 64   |
| Unknown                            | 262                                    | 7    | 32  | 3.8  | 181      | 17   | 44  | 16   |
| Type of primary surgery            |                                        |      |     |      |          |      |     |      |

|                                      |                      |      |     |     |     |      |     |     |     |
|--------------------------------------|----------------------|------|-----|-----|-----|------|-----|-----|-----|
|                                      | Mastectomy           | 1696 | 45  | 336 | 39  | 524  | 48  | 103 | 37  |
|                                      | Lumpectomy           | 2050 | 55  | 517 | 61  | 558  | 52  | 174 | 63  |
| Progesterone receptor status         |                      |      |     |     |     |      |     |     |     |
|                                      | PR-                  | 281  | 7.5 | 102 | 12  | 860  | 80  | 261 | 94  |
|                                      | PR+                  | 2019 | 54  | 661 | 77  | 15   | 1.4 | 4   | 1.4 |
|                                      | Unknown/Not measured | 1446 | 39  | 90  | 11  | 207  | 19  | 12  | 4.3 |
| HER2 status                          |                      |      |     |     |     |      |     |     |     |
|                                      | HER2-                | 2304 | 62  | 582 | 68  | 543  | 50  | 149 | 54  |
|                                      | HER2+                | 525  | 14  | 94  | 11  | 282  | 26  | 72  | 26  |
|                                      | Unknown/Not measured | 917  | 25  | 177 | 21  | 257  | 24  | 56  | 20  |
| Intention to treat with chemotherapy |                      |      |     |     |     |      |     |     |     |
|                                      | No                   | 122  | 3.3 | 22  | 2.6 | 8    | 0.7 | 6   | 2.2 |
|                                      | Yes                  | 3624 | 97  | 831 | 97  | 1074 | 99  | 271 | 98  |
| Chemotherapy                         |                      |      |     |     |     |      |     |     |     |
|                                      | No                   | 381  | 10  | 56  | 6.6 | 87   | 8   | 22  | 8   |
|                                      | Yes                  | 3365 | 90  | 797 | 93  | 995  | 92  | 255 | 92  |
| Intention to treat with Tamoxifen    |                      |      |     |     |     |      |     |     |     |
|                                      | No                   | 59   | 1.6 | 11  | 1.3 | 1075 | 99  | 276 | 100 |
|                                      | Yes                  | 3687 | 98  | 842 | 99  | 7    | 0.6 | 1   | 0.4 |
| Radiation therapy                    |                      |      |     |     |     |      |     |     |     |
|                                      | No                   | 547  | 15  | 108 | 13  | 218  | 20  | 49  | 18  |
|                                      | Yes                  | 3199 | 85  | 745 | 87  | 864  | 80  | 228 | 82  |
| Anti-HER2 therapy                    |                      |      |     |     |     |      |     |     |     |
|                                      | No                   | 2304 | 62  | 582 | 68  | 543  | 50  | 149 | 54  |
|                                      | Yes                  | 525  | 14  | 94  | 11  | 282  | 26  | 72  | 26  |
|                                      | Unknown              | 917  | 25  | 177 | 21  | 257  | 24  | 56  | 20  |
| Recurrence                           |                      |      |     |     |     |      |     |     |     |
|                                      | No                   | 3433 | 92  | 771 | 90  | 918  | 85  | 225 | 81  |
|                                      | Yes                  | 313  | 8.4 | 82  | 9.6 | 164  | 15  | 52  | 19  |
| Another malignancy                   |                      |      |     |     |     |      |     |     |     |
|                                      | No                   | 3695 | 99  | 848 | 99  | 1069 | 99  | 272 | 98  |
|                                      | Yes                  | 51   | 1.4 | 5   | 0.6 | 13   | 1.2 | 5   | 1.8 |
| Dead at end-of-follow-up             |                      |      |     |     |     |      |     |     |     |
|                                      | No                   | 3449 | 92  | 790 | 93  | 890  | 82  | 225 | 81  |
|                                      | Yes                  | 297  | 7.9 | 63  | 7.4 | 192  | 18  | 52  | 19  |
| Charlson Comorbidity Score           |                      |      |     |     |     |      |     |     |     |
|                                      | 0                    | 3733 | 100 | 853 | 100 | 1067 | 99  | 277 | 100 |
|                                      | 1                    | 4    | 0.1 | 0   | 0   | 4    | 0.4 | 0   | 0   |
|                                      | 2                    | 2    | 0.1 | 0   | 0   | 3    | 0.3 | 0   | 0   |
|                                      | 3+                   | 7    | 0.2 | 0   | 0   | 8    | 0.7 | 0   | 0   |

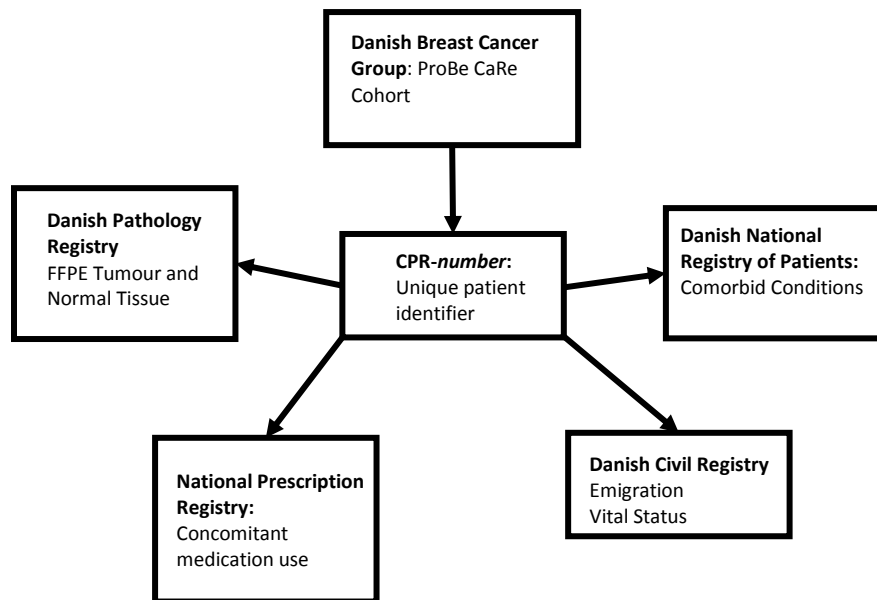

**Electronic Supplementary Figure 1** Use of unique personal identifier, CPR-number, to link study cohort to Danish national registries for data completeness in the ProBe CaRe cohort study.
